# Supplementary material
Source: publisher site journal article supplement (https://www.dovepress.com/article/274862)
Supplement: Supplementary file 1 [file get_supplementary_file.php]

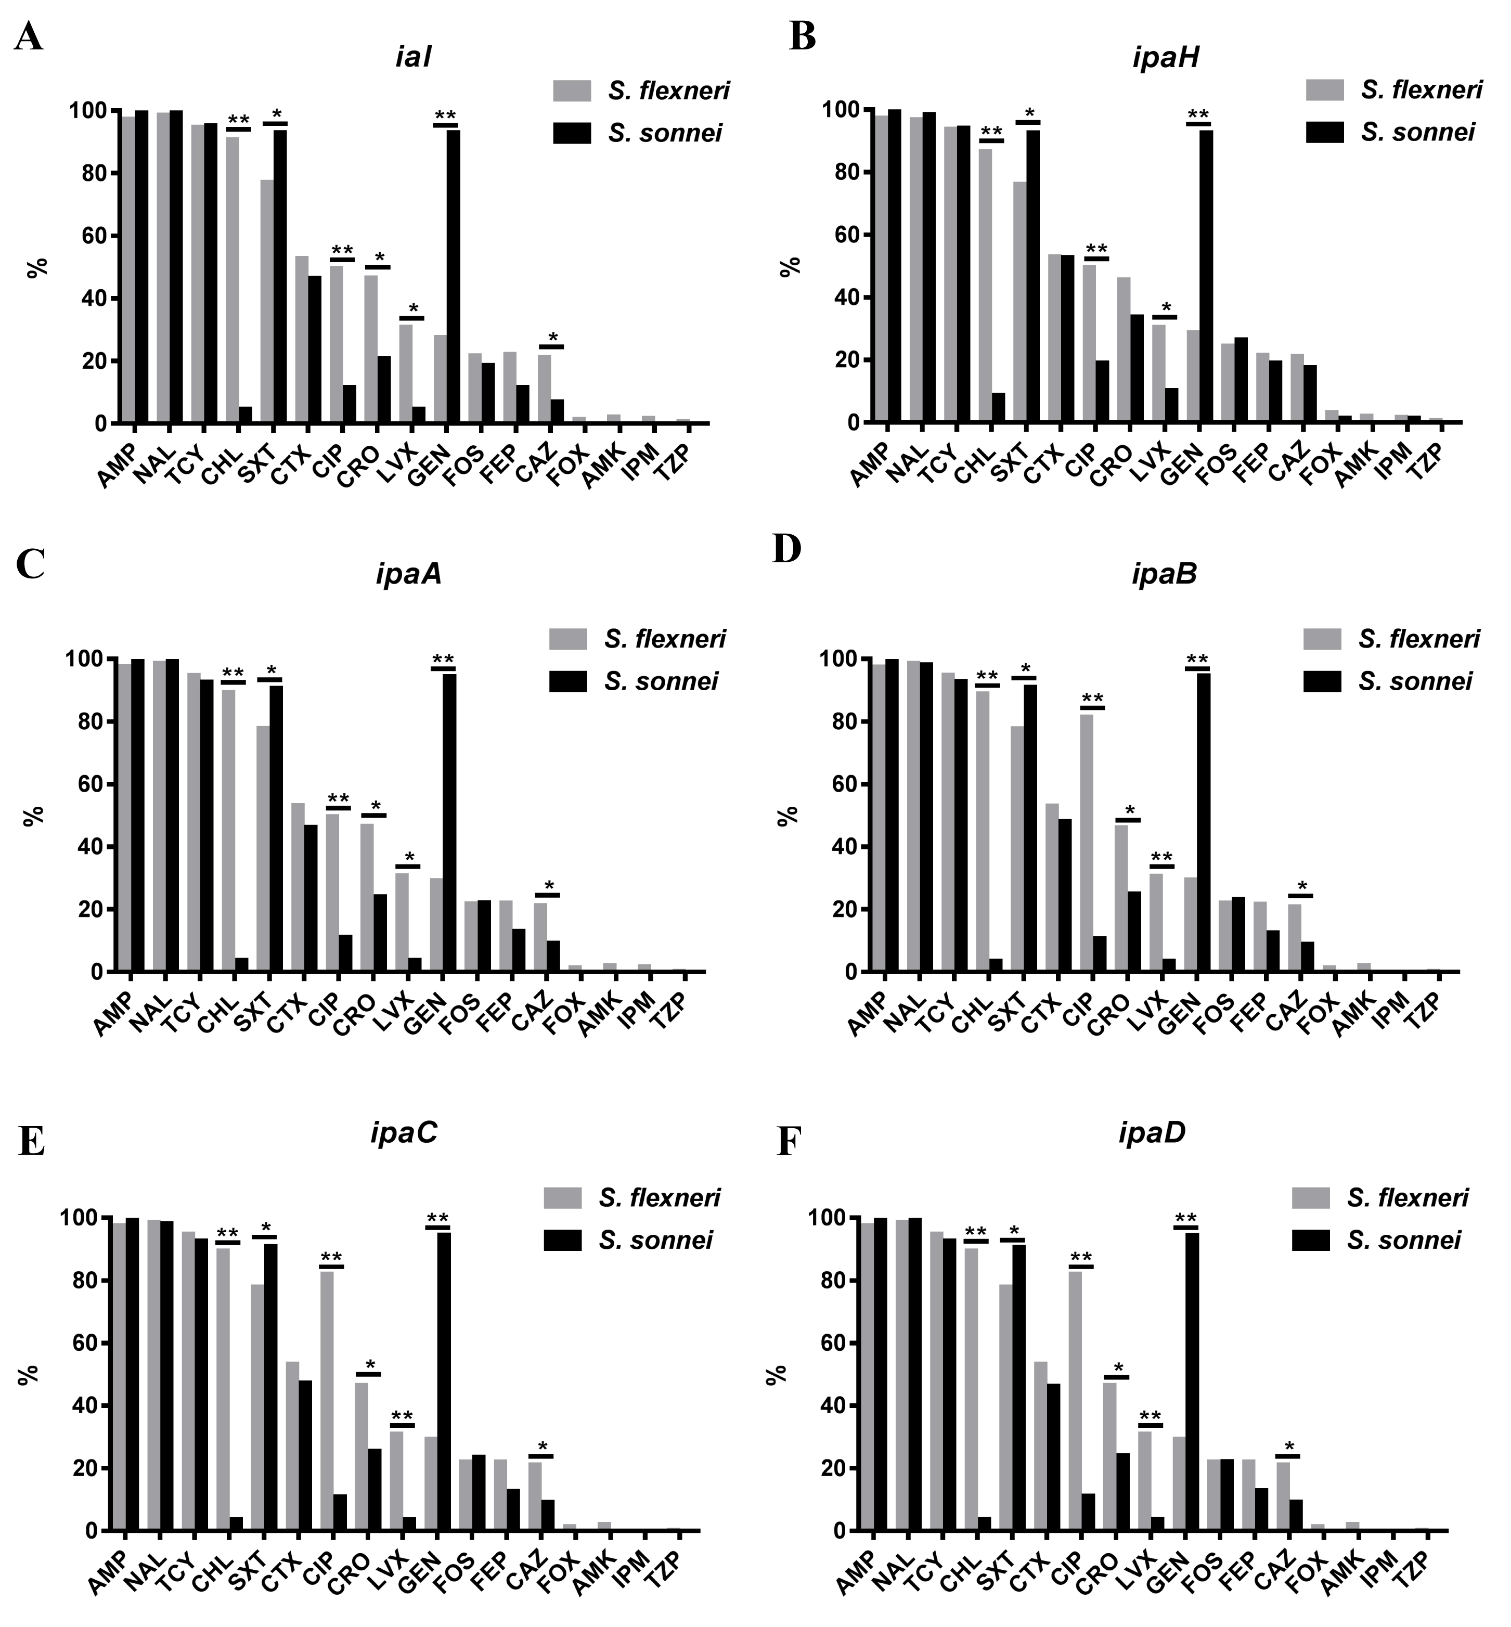


**Supplementary Figure 1.** Comparison of the antimicrobial resistance rates between virulence-related gene (VRG)-positive *S. flexneri* and *S. sonnei.* (**A**) Comparison of the antimicrobial resistance rates between *ial*-positive *S. flexneri* and *S. sonnei.* (**B**) Comparison of the antimicrobial resistance rates between *ipaH*-positive *S. flexneri* and *S. sonnei.* (**C**) Comparison of the antimicrobial resistance rates between *ipaA*-positive *S. flexneri* and *S. sonnei.* (**D**) Comparison of the antimicrobial resistance rates between *ipaB*-positive *S. flexneri* and *S. sonnei.* (**E**) Comparison of the antimicrobial resistance rates between *ipaC*-positive *S. flexneri* and *S. sonnei.* (**F**) Comparison of the antimicrobial resistance rates between *ipaD*-positive *S. flexneri* and *S. sonnei*.*, *P*<0.05; **, *P*<0.001.

**
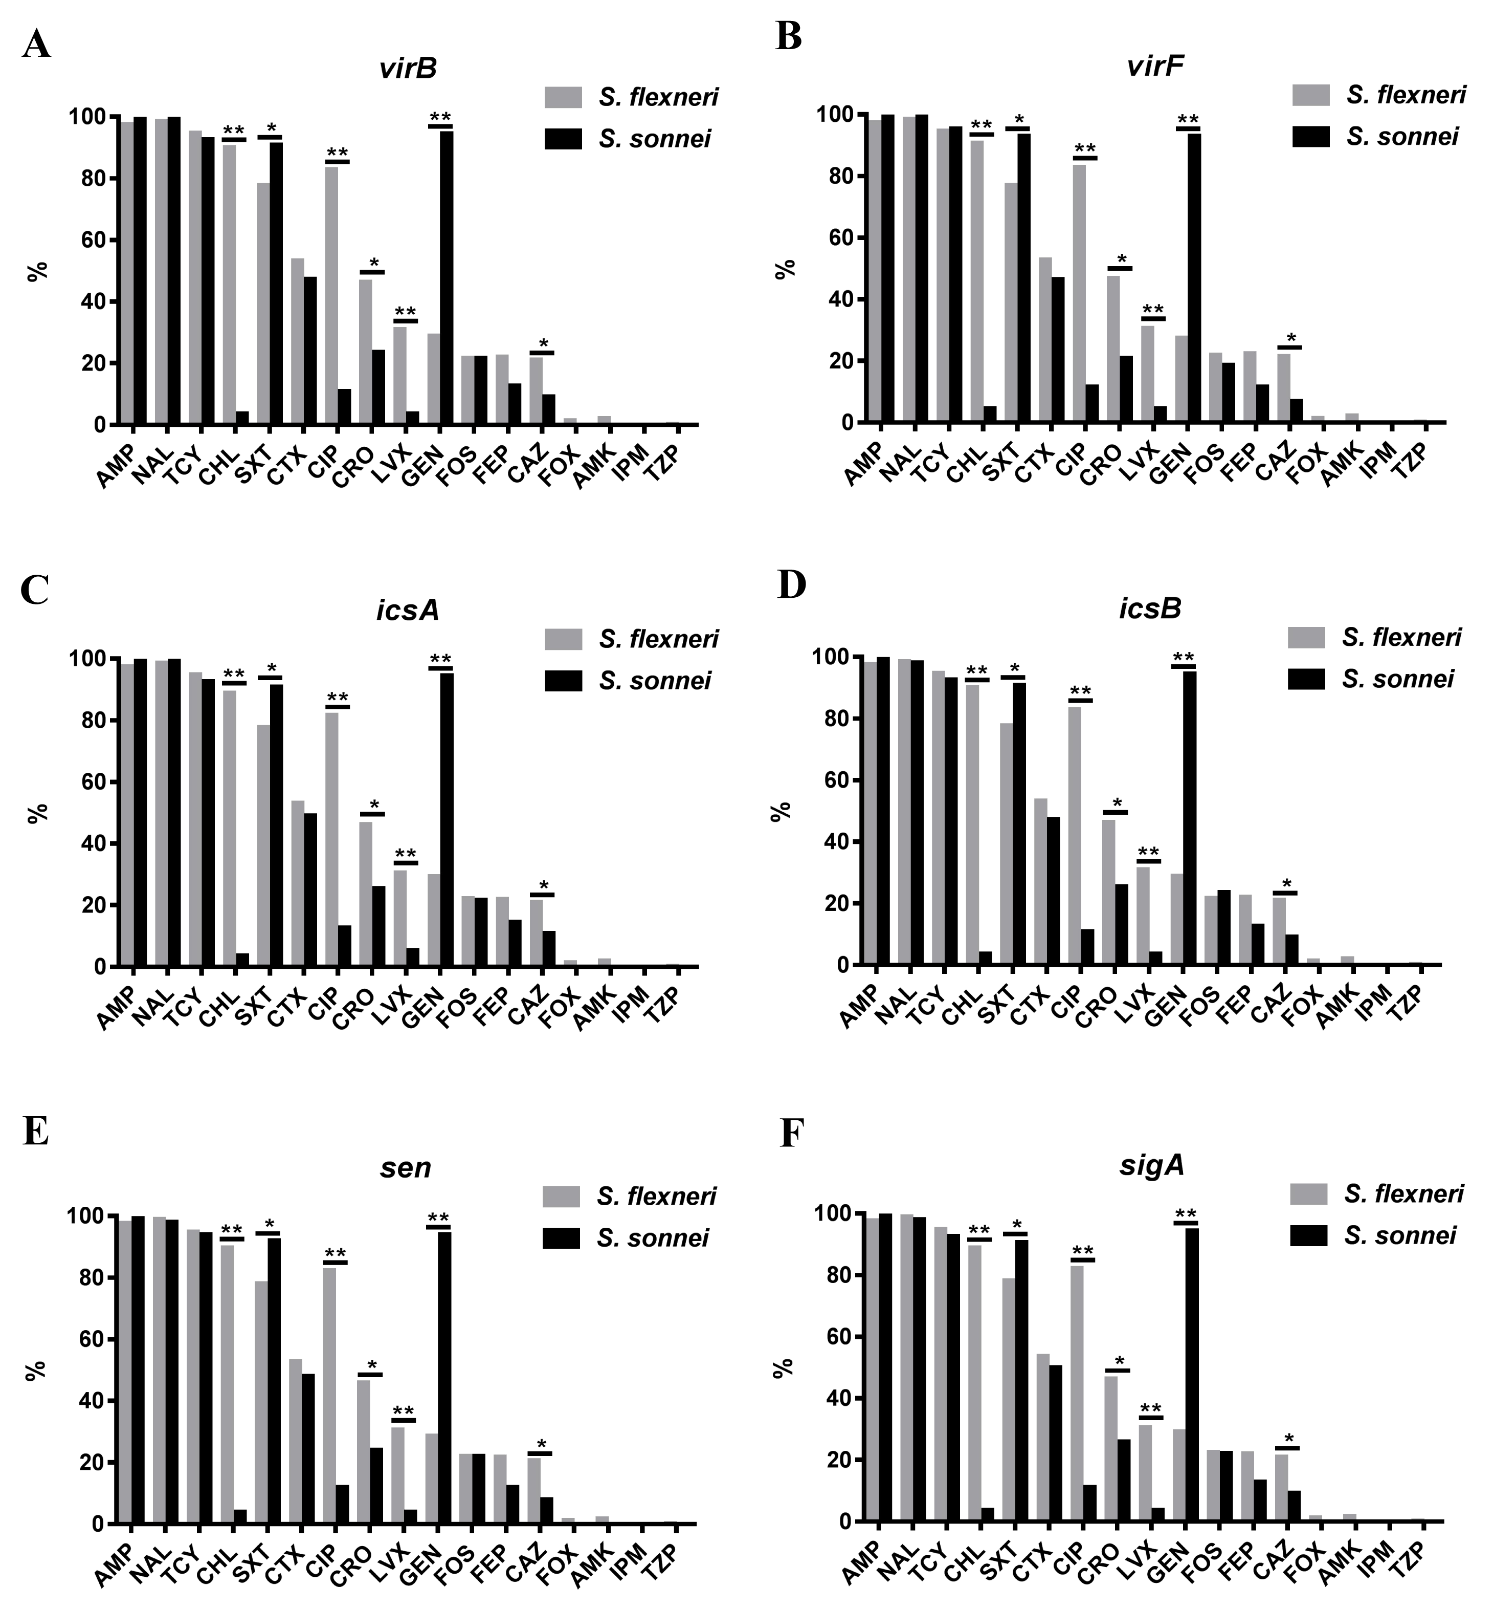
Supplementary Figure 2.** Comparison of the antimicrobial resistance rates between virulence-related gene (VRG)-positive *S. flexneri* and *S. sonnei.* (**A**) Comparison of the antimicrobial resistance rates between *virB*-positive *S. flexneri* and *S. sonnei.* (**B**) Comparison of the antimicrobial resistance rates between *virF*-positive *S. flexneri* and *S. sonnei.* (**C**) Comparison of the antimicrobial resistance rates between *icsA*-positive *S. flexneri* and *S. sonnei.* (**D**) Comparison of the antimicrobial resistance rates between *icsB*-positive *S. flexneri* and *S. sonnei.* (**E**) Comparison of the antimicrobial resistance rates between *sen*-positive *S. flexneri* and *S. sonnei.* (**F**) Comparison of the antimicrobial resistance rates between *sigA*-positive *S. flexneri* and *S. sonnei*. *, *P*<0.05; **, *P*<0.001.
